# Supplementary material for: Characteristics of People with Type I or Type II Diabetes with and without a History of Homelessness: A Population-based Cohort Study
Source: medRxiv preprint, doi:10.1101/2022.08.11.22278127, version 1 (2022-08-12)

Supplemental Figure S1: A summary of the methods to create a matched cohort of people with diabetes with a history of homelessness and non-homeless controls.


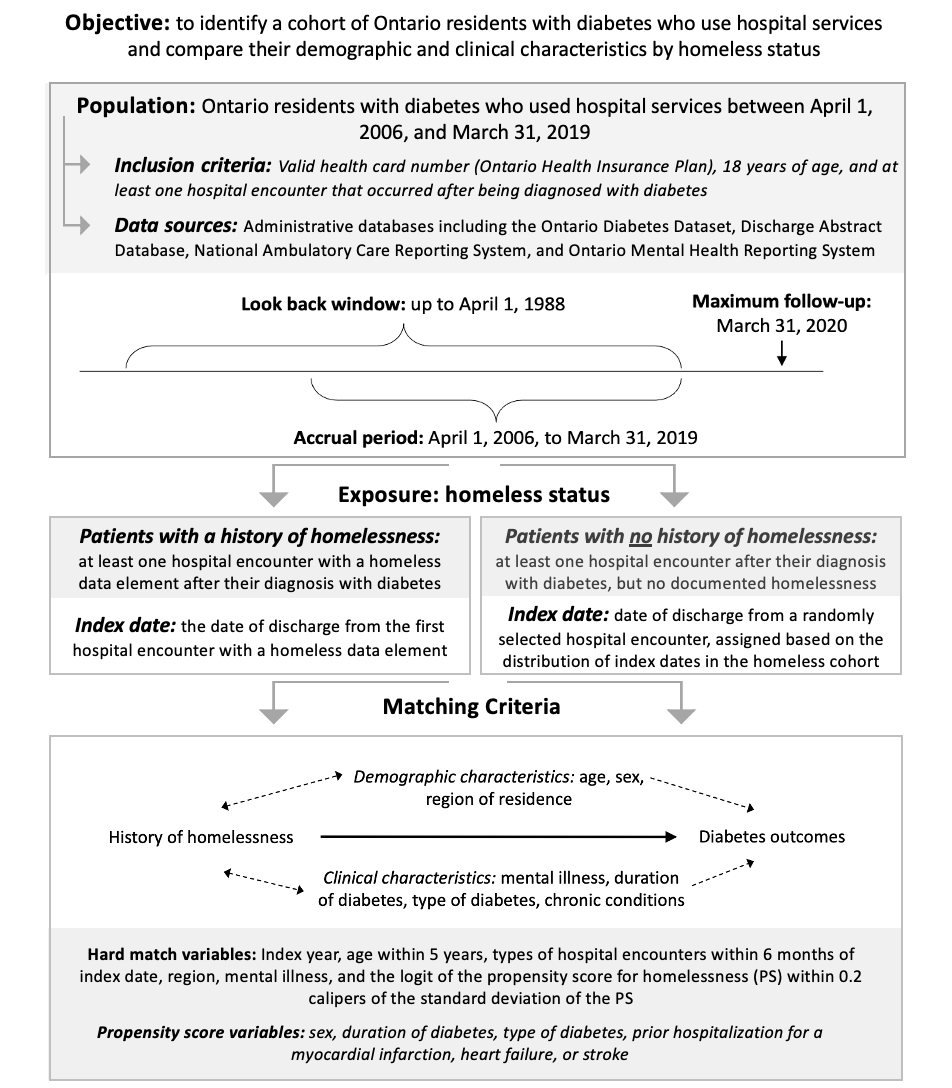

Supplement: Supplemental Figure S1 [file 278127_file08.docx]
